# Supplementary material for: Isolation, N-glycosylations and Function of a Hyaluronidase-Like Enzyme from the Venom of the Spider Cupiennius salei
Source: PubMed Central journal article supplement (PMC4667920; doi:10.1371/journal.pone.0143963), 2015-12-02

S3 Figure. Hyal activity and substrate specificity of different spider venoms. Degradation of GAG standards (HA, CS4, DS, and HS) after incubation with venom of the examined spider species. Standards were incubated in a ratio of 1:1 with 1:25 diluted venom in 200 mM NaAc, 150 mM NaCl, pH 5.8 for HA, CS4, and DS, and in a 50 mM Tris-HCl, 150 mM NaCl buffer, pH 7.5 for HS. The degradation process was revealed after agarose gel electrophoresis and sequential staining with toluidine blue and Stains-All.

## Mygalomorphae

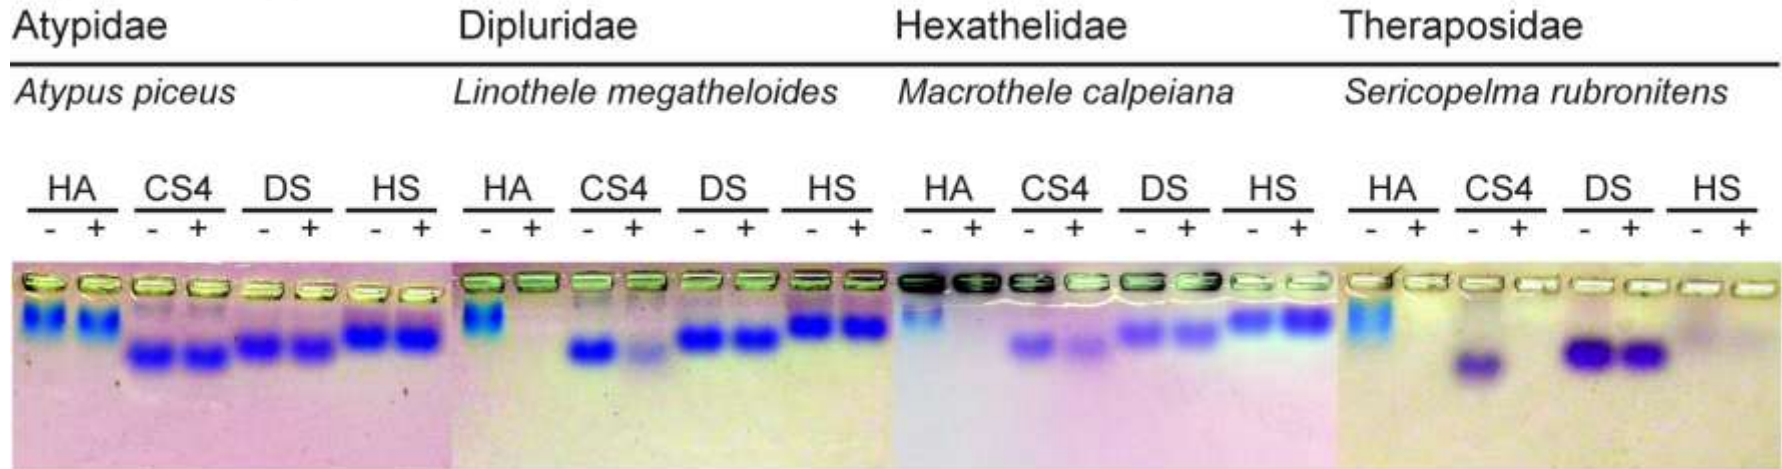

## Araneomorphae

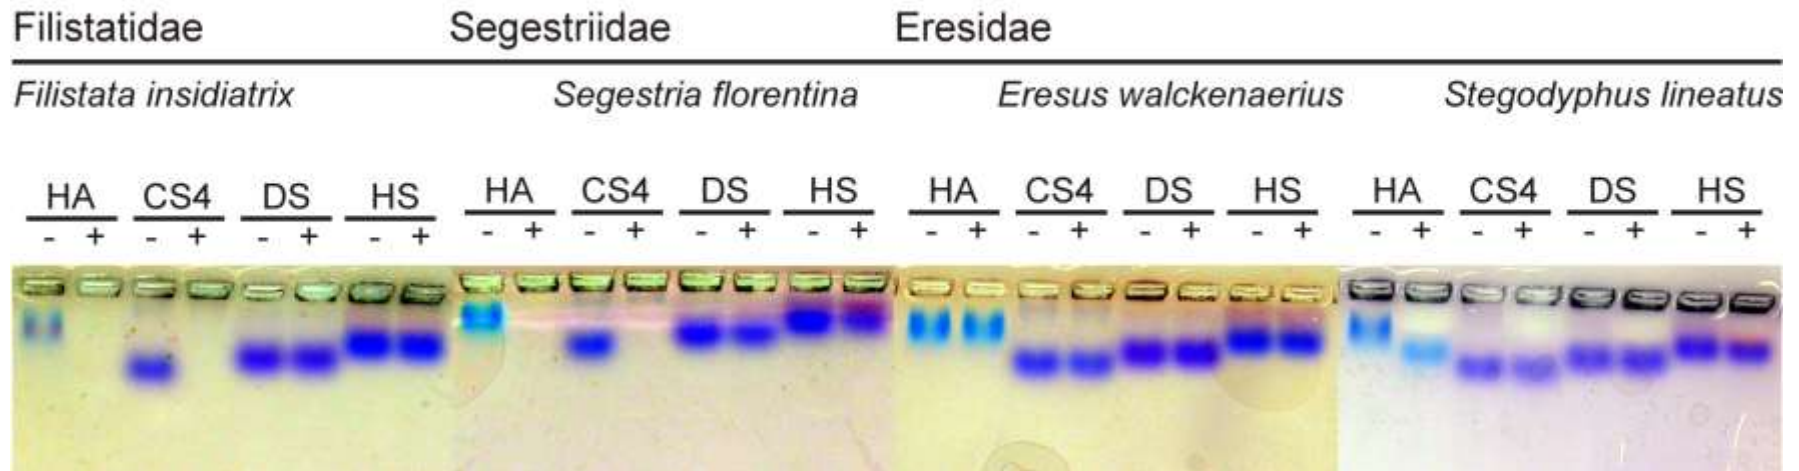

Theridiidae

Tetragnathidae

Nephilidae

*Latrodectus tredecimguttatus* *Steatoda paykulliana*

*Meta menardi*

*Nephila pilipes*

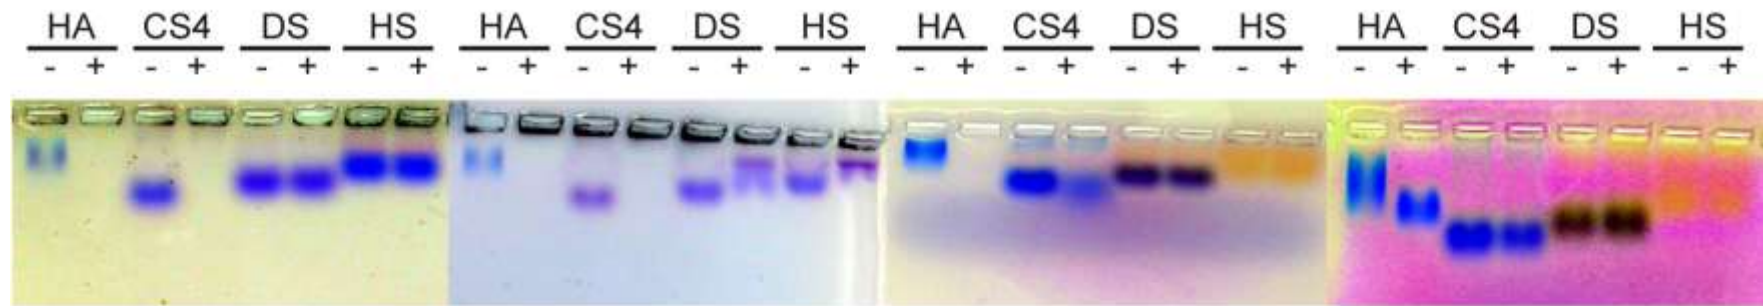

Araneidae

*Araneus angulatus*

*Araneus diadematus*

*Argiope bruennichi*

*Larinooides sclopetarius*

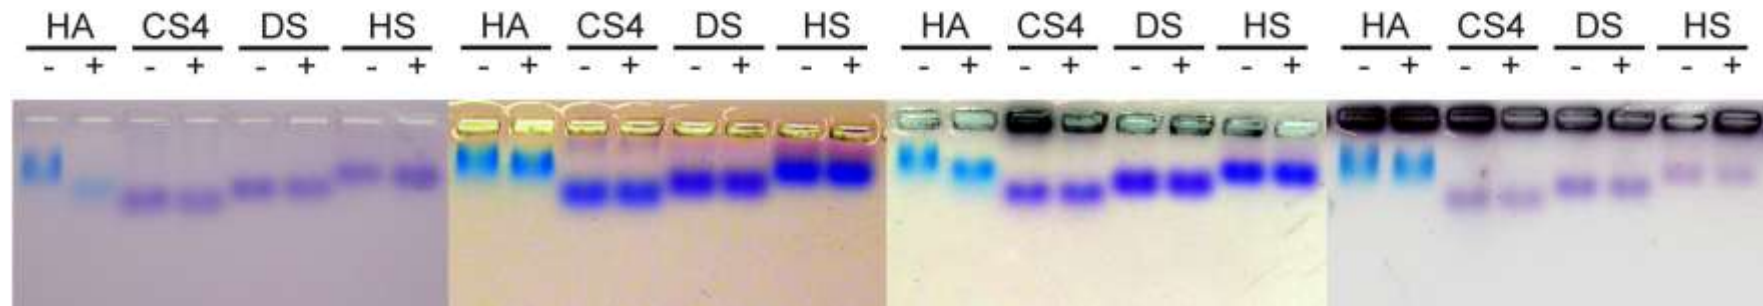

# Araneomorphae, RTA-clade

Amaurobiidae

Agelenidae

Sparassidae

*Callobius claustrarius*

*Agelena labyrinthica*

*Tegenaria atrica*

*Eusparassus dufouri*

| HA |   | CS4 |   | DS |   | HS |   | HA |   | CS4 |   | DS |   | HS |   | HA |   | CS4 |   | DS |   | HS |   |   |   |
|----|---|-----|---|----|---|----|---|----|---|-----|---|----|---|----|---|----|---|-----|---|----|---|----|---|---|---|
| -  | + | -   | + | -  | + | -  | + | -  | + | -   | + | -  | + | -  | + | -  | + | -   | + | -  | + | -  | + | - | + |

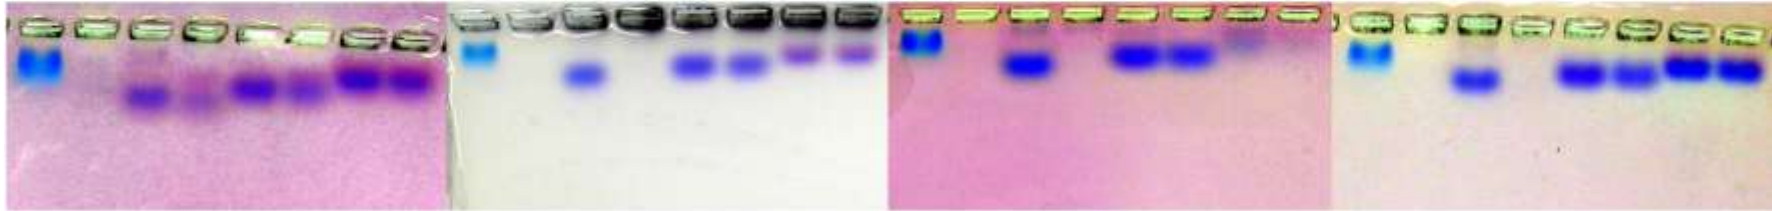

Gnaphosidae

Zoropsidae

*Isopeda villosa*

*Polybetes pythagoricus*

*Drassodes lapidosus*

*Zoropsis spinimana*

| HA |   | CS4 |   | DS |   | HS |   | HA |   | CS4 |   | DS |   | HS |   | HA |   | CS4 |   | DS |   | HS |   |   |   |
|----|---|-----|---|----|---|----|---|----|---|-----|---|----|---|----|---|----|---|-----|---|----|---|----|---|---|---|
| -  | + | -   | + | -  | + | -  | + | -  | + | -   | + | -  | + | -  | + | -  | + | -   | + | -  | + | -  | + | - | + |

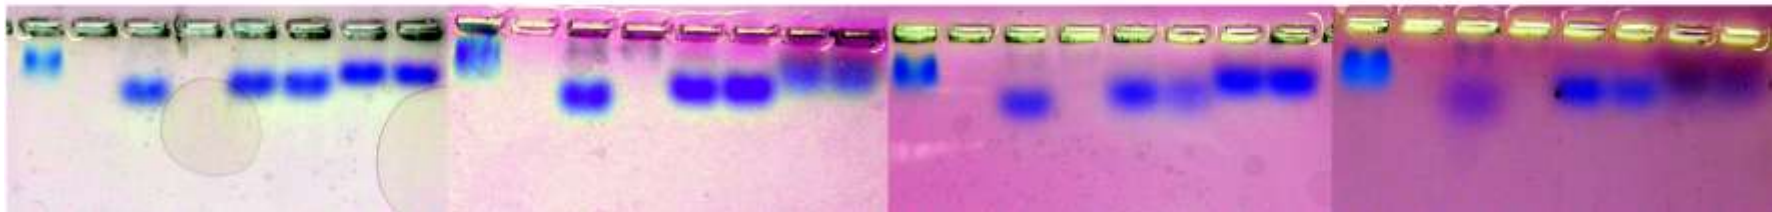

Oxyopidae

Pisauridae

Lycosidae

*Oxyopes* sp.

*Dolomedes okefinokensis*

*Pisaura mirabilis*

*Alopecosa fabrilis*

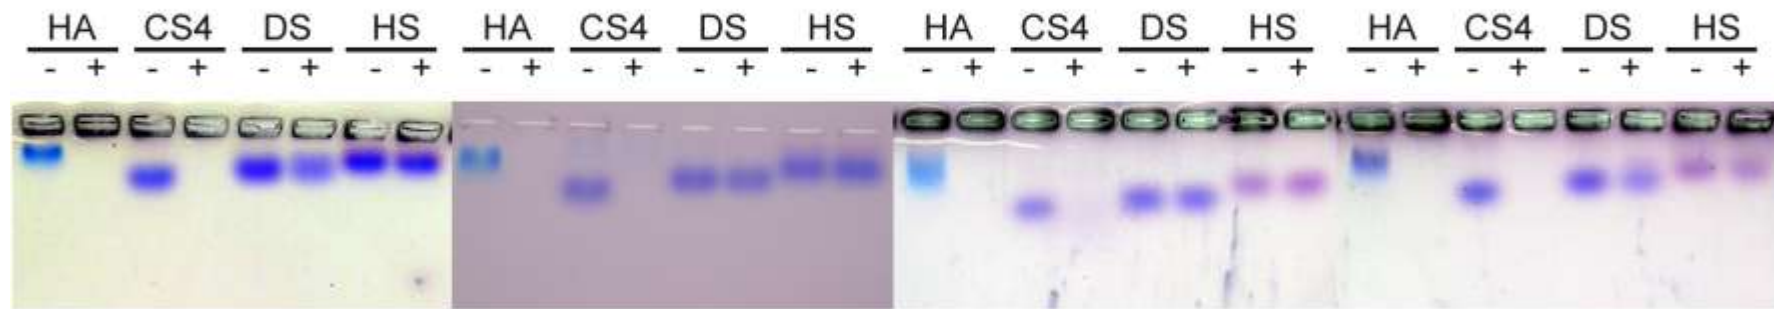

Lycosidae

*Alopecosa marikovskyi*

*Geolycosa vultuosa*

*Hogna radiata*

*Lycosa hispanica*

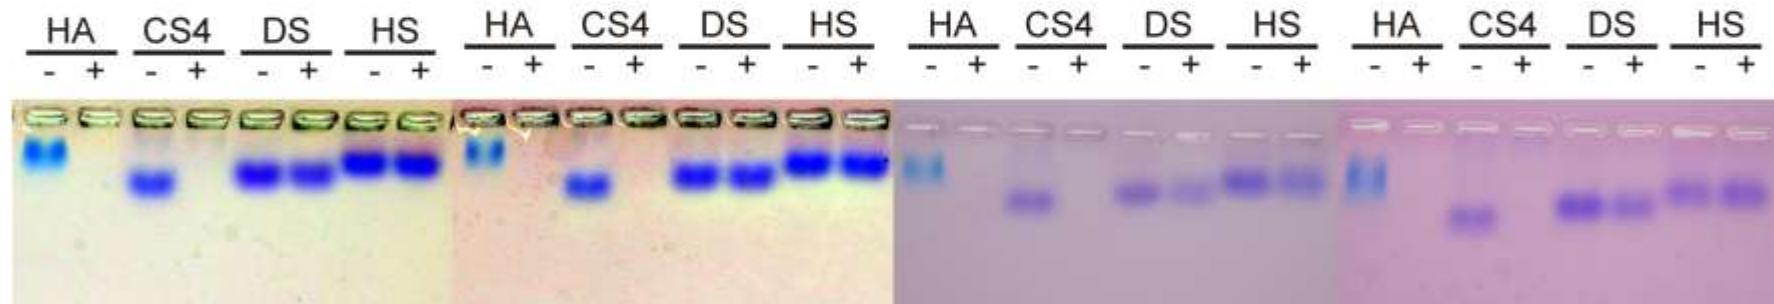

Lycosidae

Ctenidae

*Lycosa praegrandis*

*Ancylometes rufus*

*Cupiennius salei*

*Phoneutria fera*

| HA |   | CS4 |   | DS |   | HS |   | HA |   | CS4 |   | DS |   | HS |   | HA |   | CS4 |   | DS |   | HS |   |   |   |
|----|---|-----|---|----|---|----|---|----|---|-----|---|----|---|----|---|----|---|-----|---|----|---|----|---|---|---|
| -  | + | -   | + | -  | + | -  | + | -  | + | -   | + | -  | + | -  | + | -  | + | -   | + | -  | + | -  | + | - | + |

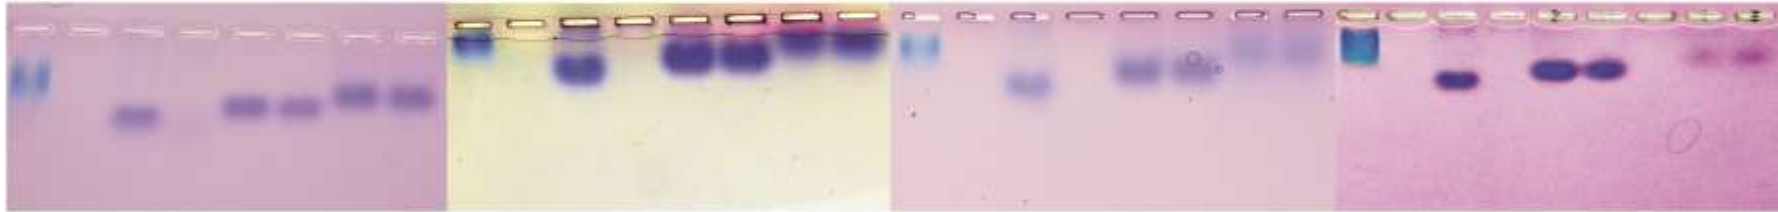

Ctenidae

Oecobiidae

*Phoneutria reidyi*

*Viridasius fasciatus*

*Uroctea durandi*

| HA |   | CS4 |   | DS |   | HS |   | HA |   | CS4 |   | DS |   | HS |   |
|----|---|-----|---|----|---|----|---|----|---|-----|---|----|---|----|---|
| -  | + | -   | + | -  | + | -  | + | -  | + | -   | + | -  | + | -  | + |

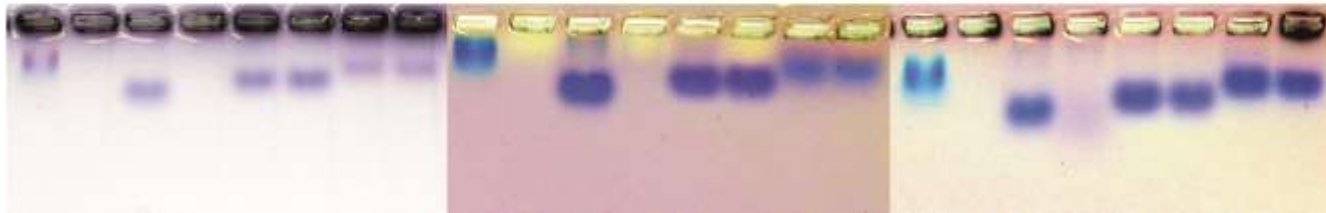

Supplement: pone.0143963.s003.pdf [file pone.0143963.s003.pdf]
